# Supplementary material for: A novel synthetic approach for the preparation of sulfated titania with enhanced photocatalytic activity
Source: Royal Society of Chemistry journal article supplement (doi:10.1039/c3ra23451g), 2013-01-01
Supplement: c3ra23451g.pdf [file c3ra23451g.pdf]

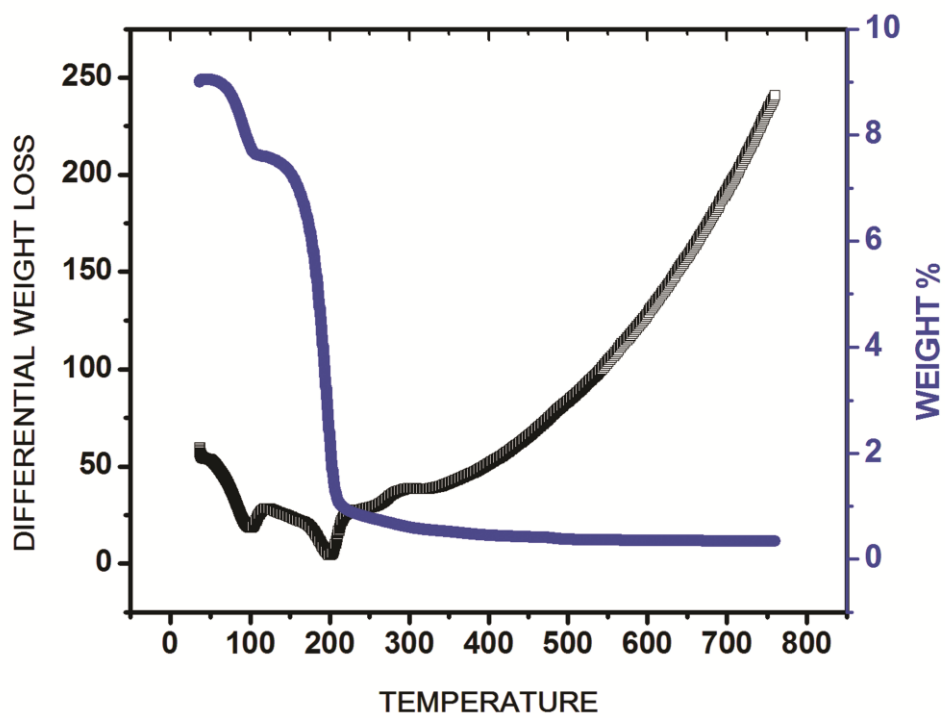

Figure S1. TGA of sulfur doped titania P1.

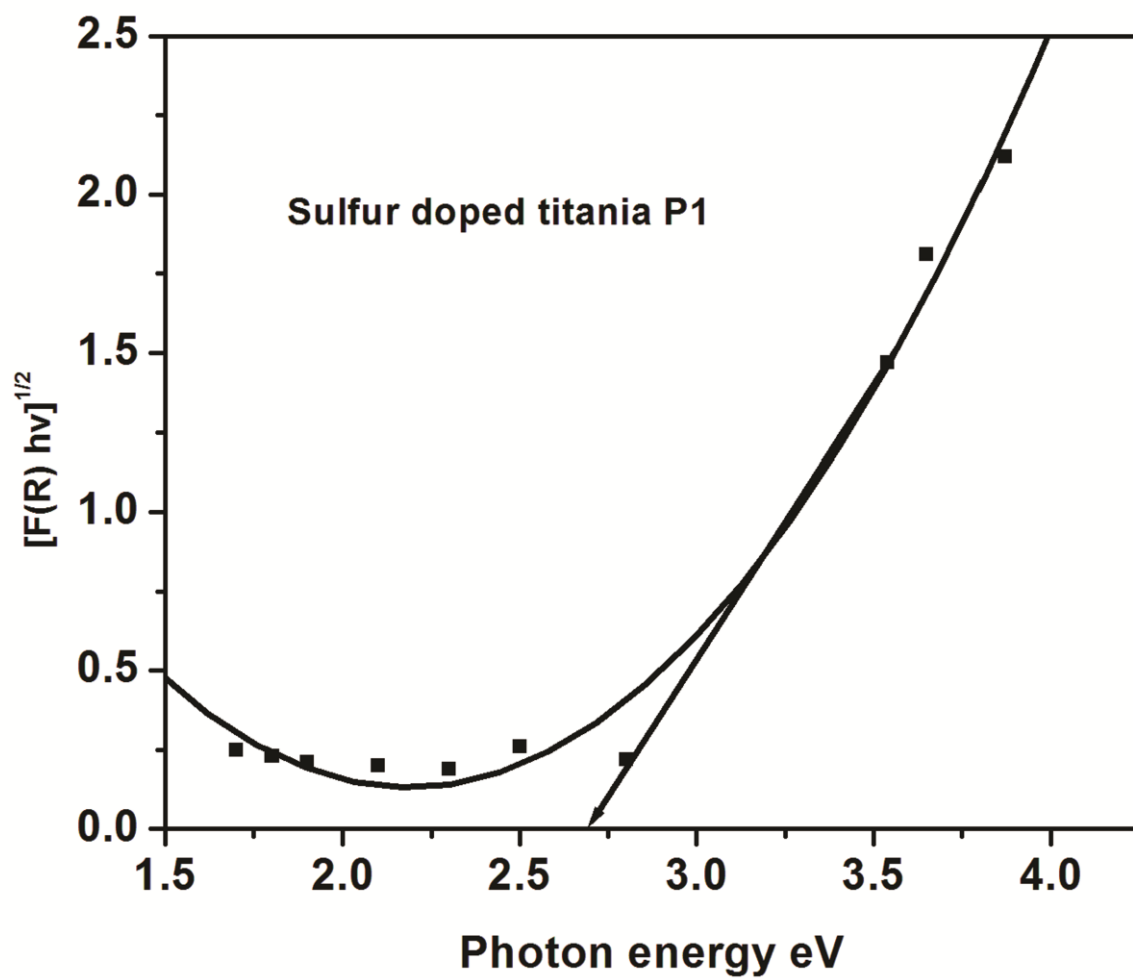

Figure S2. Tauc plots of S-doped titania P1.

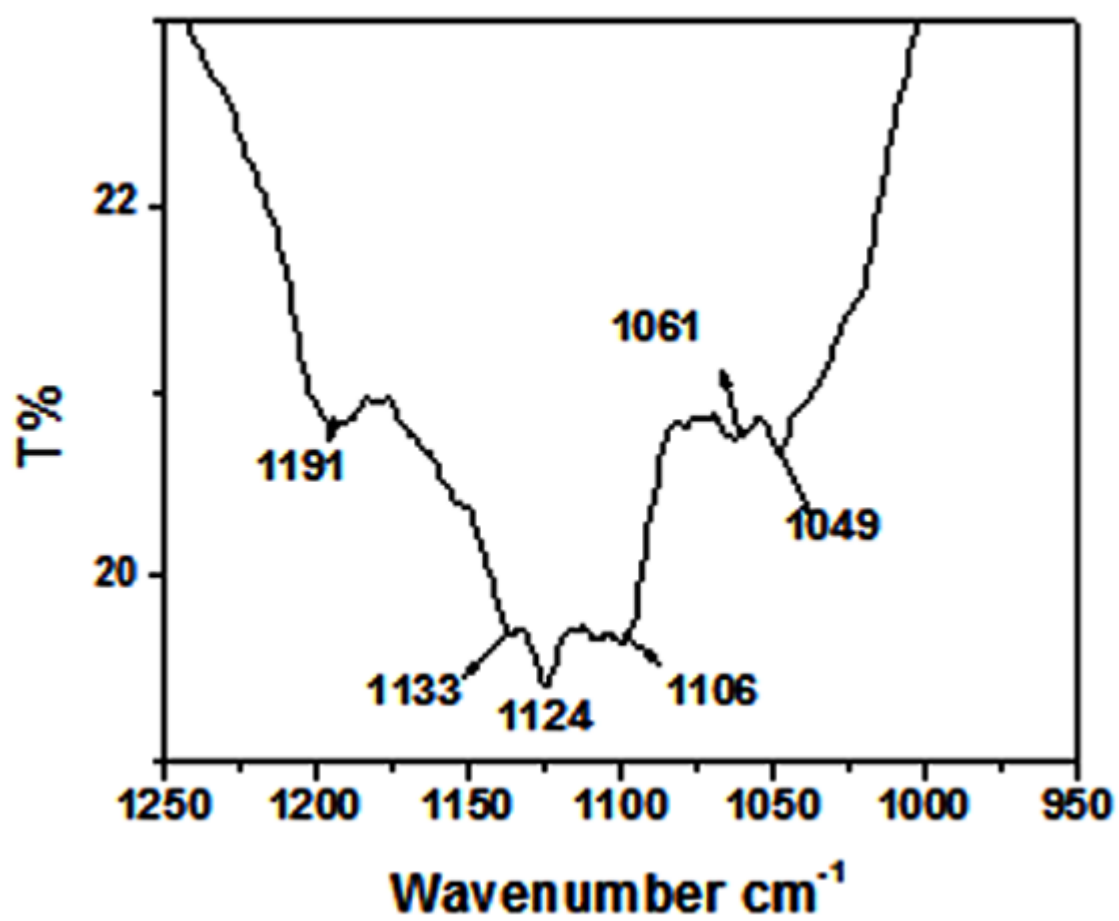

Figure S3. FTIR spectra of sulfur doped titania P1 in the range 1200-950 cm<sup>-1</sup>.

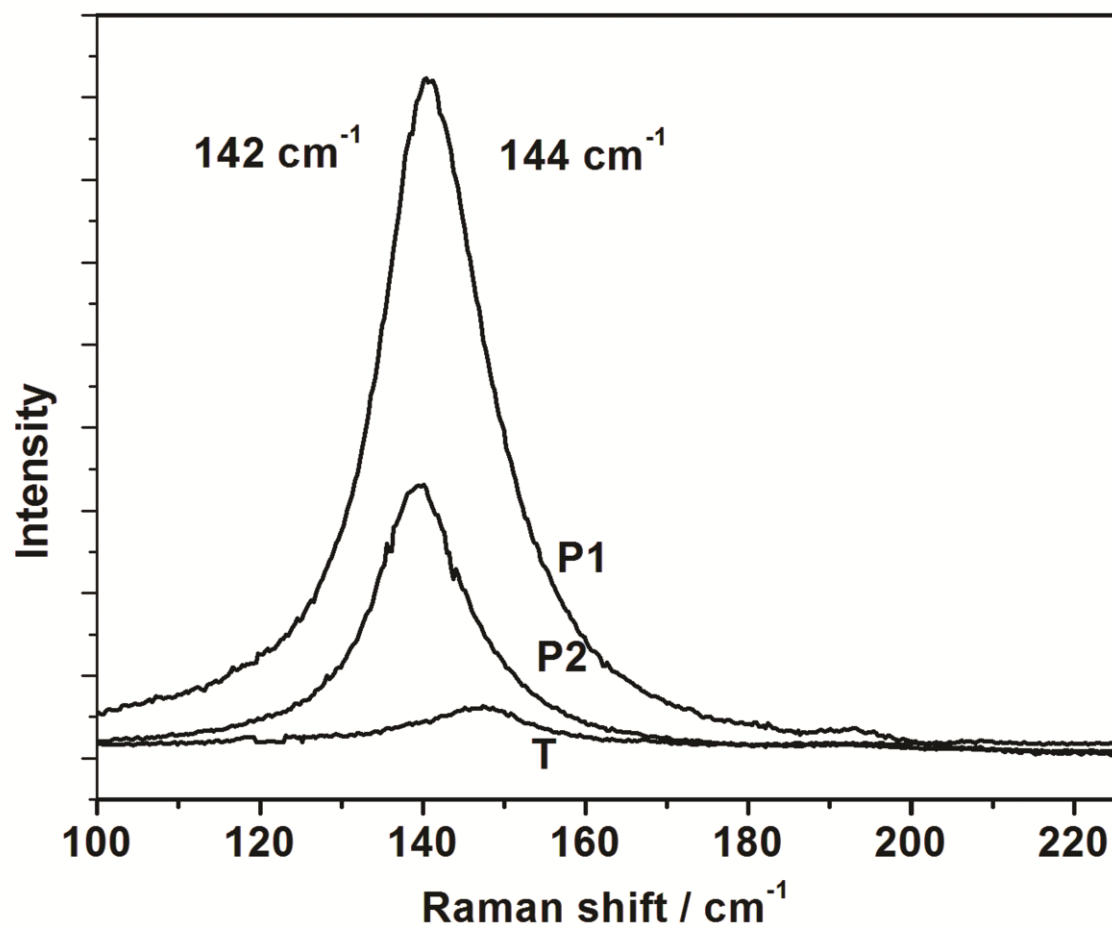

Figure S4. Raman shifts of P1, P2, and T.

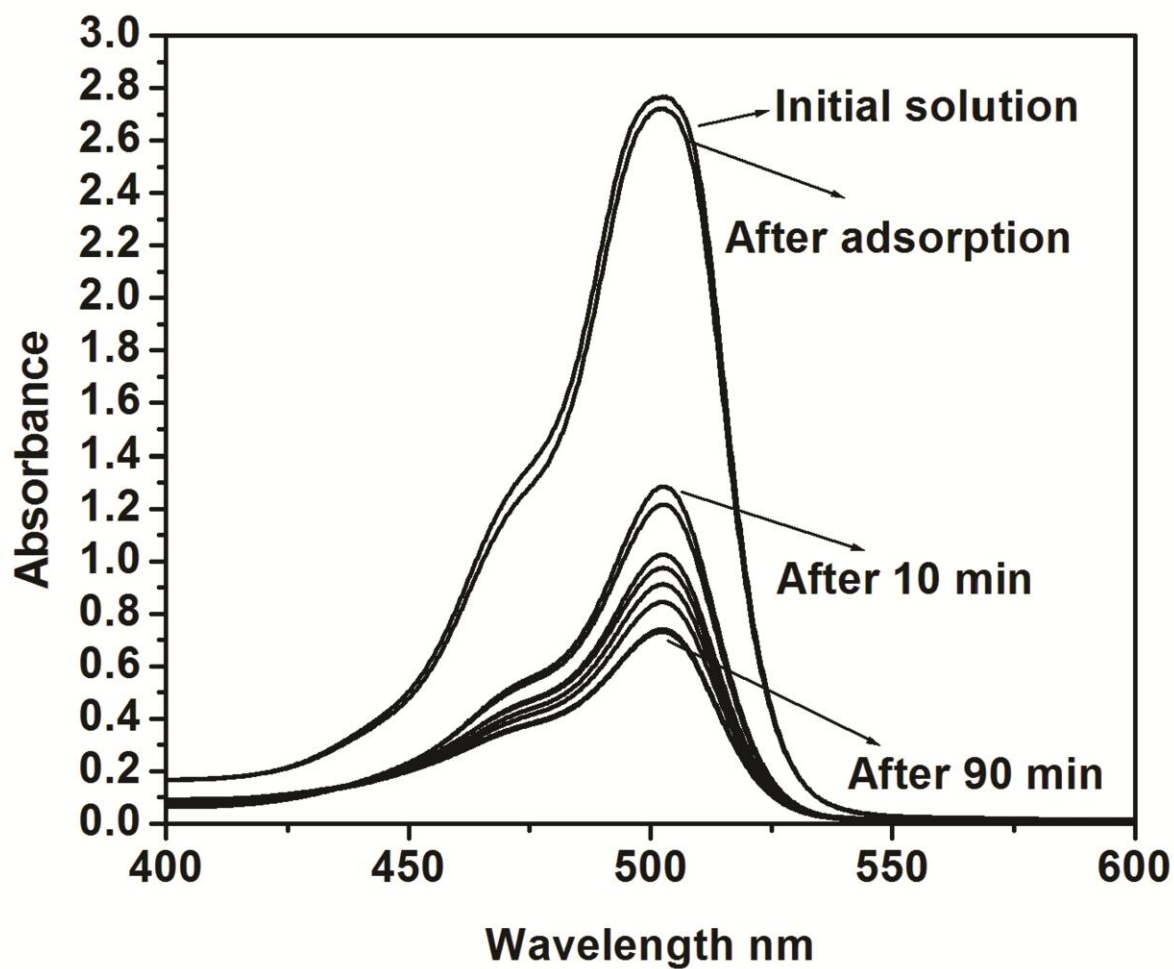

Figure S5. Decomposition of 2, 7-dichloro fluorescein under uv light.

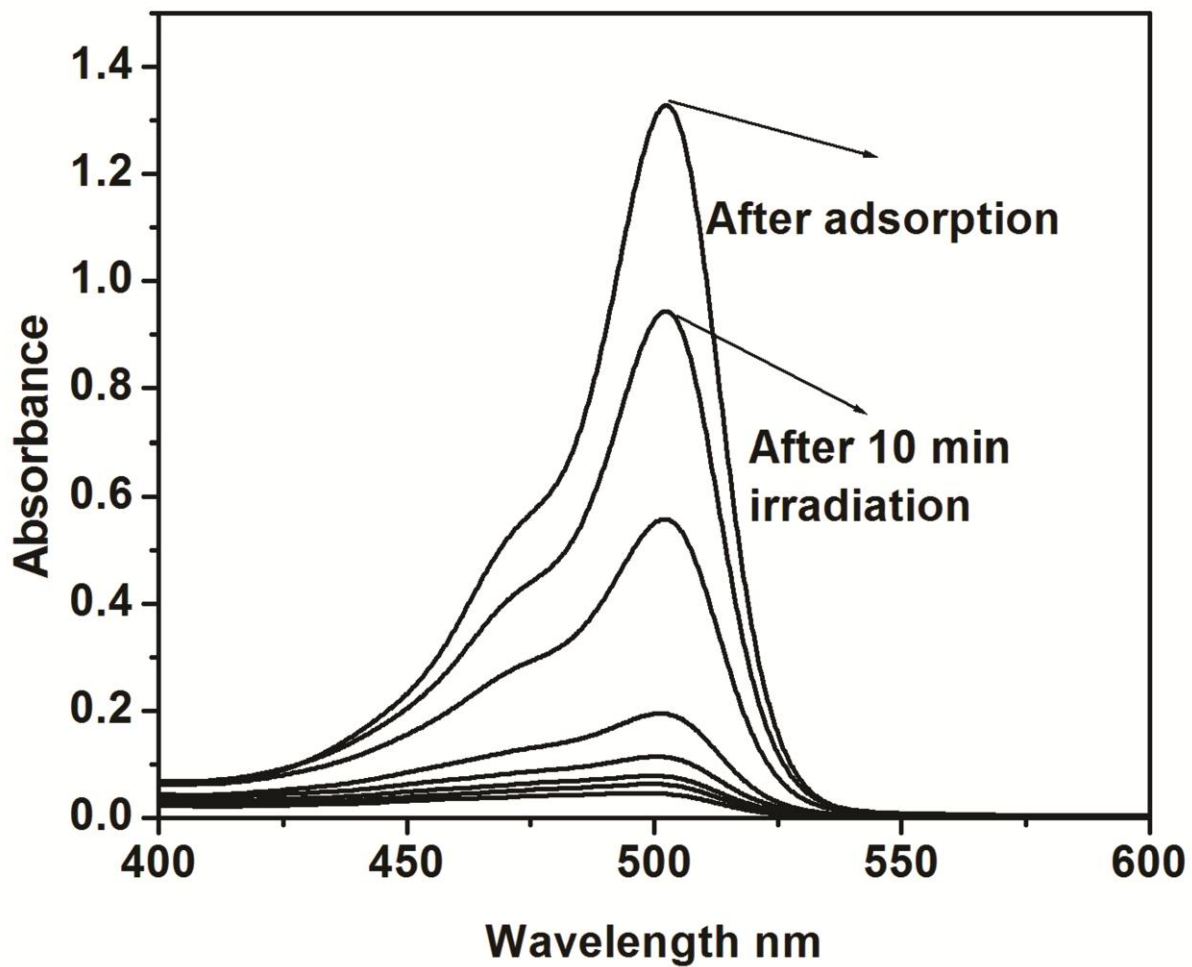

Figure S6. Decomposition of 2, 7-dichloro fluorescein with sulfur doped titania P1.
